# Supplementary material for: Large-scale synthesis of carbon dots/TiO2 nanocomposites for the photocatalytic color switching system
Source: Royal Society of Chemistry journal article supplement (doi:10.1039/c9na00054b), 2019-01-01
Supplement: c9na00054b1.pdf [file c9na00054b1.pdf]

## Supporting information

### **Large-scale synthesis of carbon dots/TiO<sub>2</sub> nanocomposites for photocatalytic color switching**

Aiwu Wang<sup>1,2+</sup>, Xufen Xiao<sup>2+</sup>, Cangtao Zhou<sup>1,3,4</sup>, Fucong Lyu<sup>2</sup>, Li Fu<sup>5</sup>, Chundong Wang<sup>6\*</sup>, Shuangchen Ruan<sup>1,3</sup>

<sup>1</sup> *Center for Advanced Material Diagnostic Technology, Shenzhen Technology University, Shenzhen 518118, People's Republic of China*

<sup>2</sup> *Center of Super-Diamond and Advanced Films (COSDAF), City University of Hong Kong, Hong Kong, People's Republic of China*

<sup>3</sup> *College of Applied Technology, Shenzhen University, Shenzhen 518060, People's Republic of China*

<sup>4</sup> *Center for Applied Physics and Technology, HEDPS, and School of Physics, Peking University, Beijing 100871, People's Republic of China*

<sup>5</sup> *College of Materials and Environmental Engineering, Hangzhou Dianzi University, Hangzhou 310018, People's Republic of China*

<sup>6</sup> *School of Optical and Electronic Information, Huazhong University of Science and Technology, Wuhan 430074, People's Republic of China*

\*Corresponding author E-mail: apcdwang@hust.edu.cn

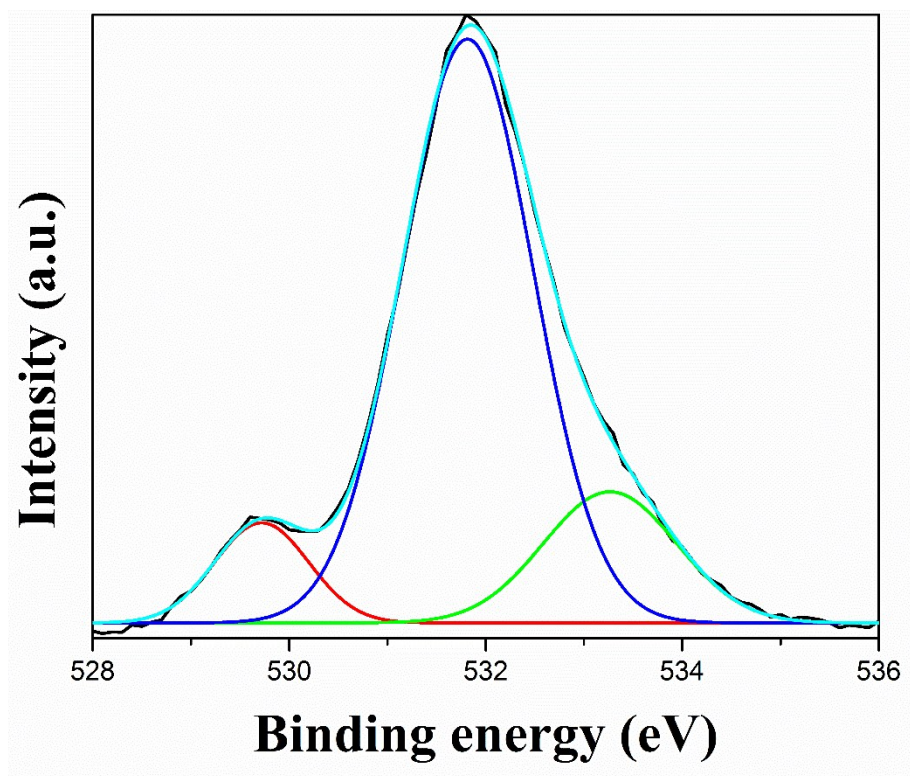

Figure S1 XPS O 1s spectrum of CDs/TiO<sub>2</sub> nanocomposites.

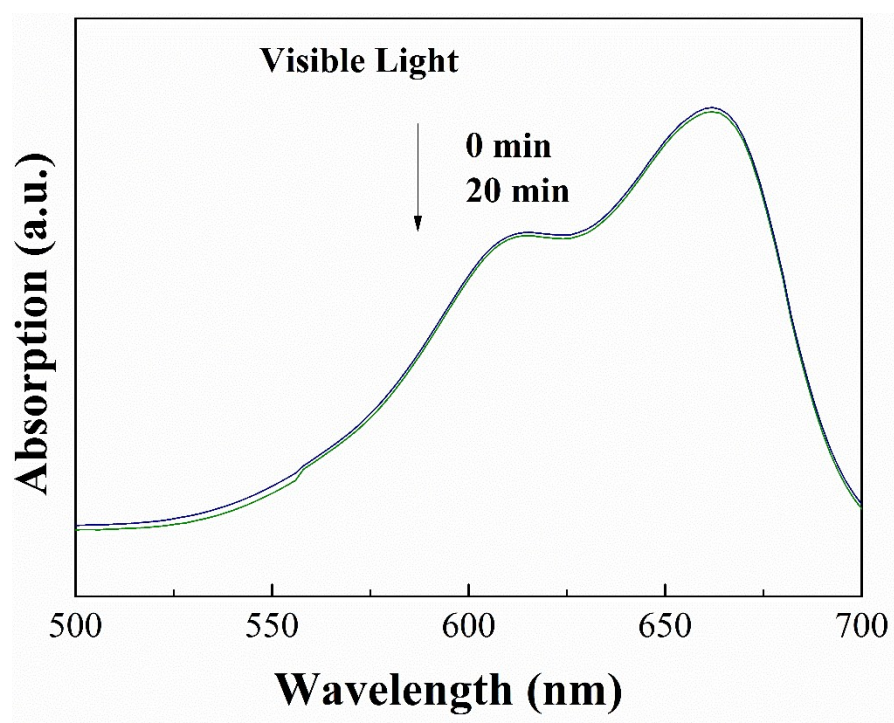

Figure S2. UV-vis spectra of the CDs/TiO<sub>2</sub> nanocomposites under recoloration process under visible light irradiation.

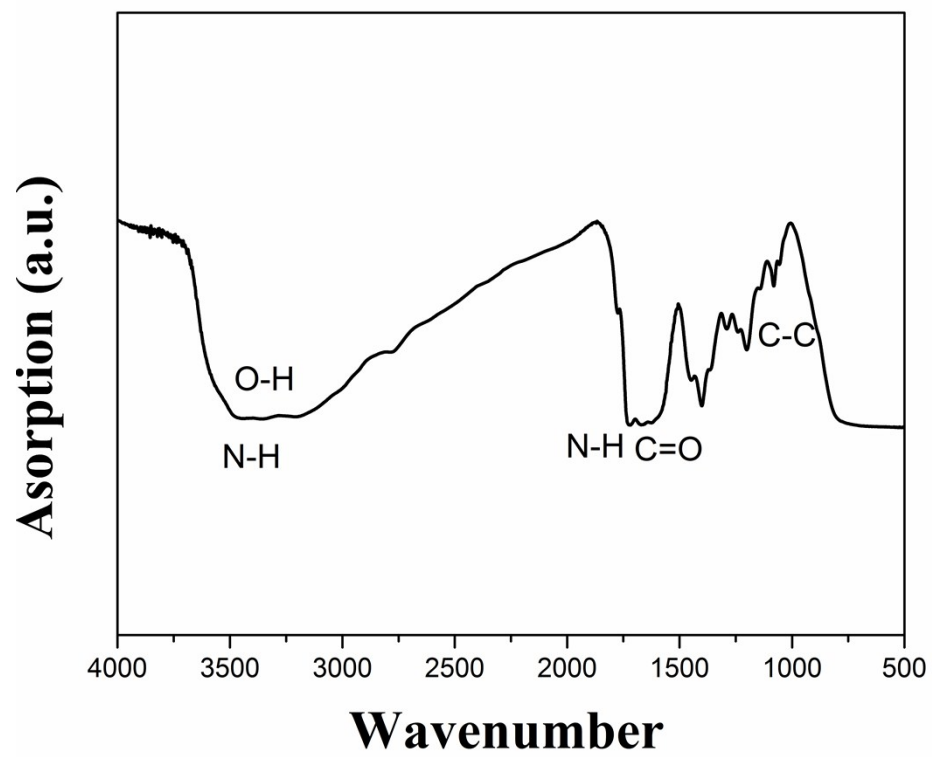

Figure S3. FTIR of obtained nitrogen rich carbon dots.

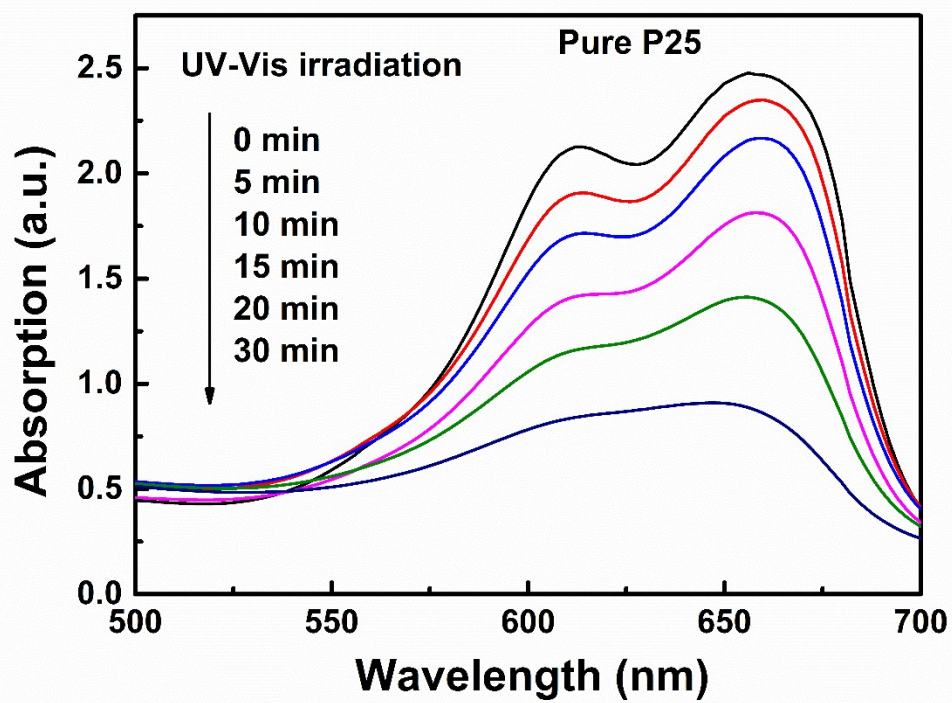

Figure S4. UV-vis spectra of P25 under recoloration process under UV-visible light irradiation.
